# Supplementary material
Source: publisher figshare collection journal article supplement (https://frontiersin.figshare.com/ndownloader/files/17710409)
Supplement: Supplementary file [file 17710409]

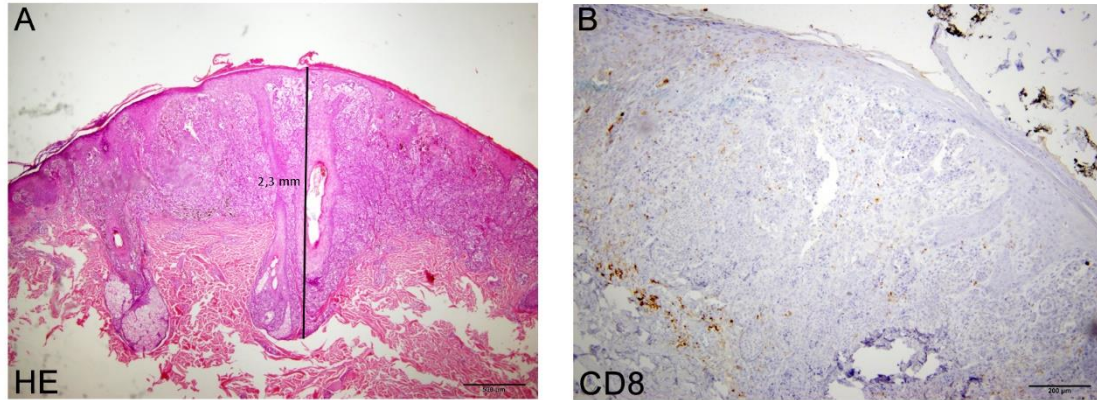

**Supplementary Figure 1. Histology of pt-045 primary tumor.** (A) HE staining of the cutaneous melanoma; Breslow thickness is indicated. (B) Immunohistochemistry revealed scarce CD8<sup>+</sup> lymphocytes infiltrating the tumor. Original magnifications: 40X (A), 100X (B). Scale bars: 500 μm (A), 200 μm (B).
